# Supplementary material for: Synthesis, Structure, and Magnetic and Biological Properties of Copper(II) Complexes with 1,3,4-Thiadiazole Derivatives
Source: MDPI journal article supplement (doi:10.3390/ijms241613024), 2023-08-21
Supplement: s1 [file s1]

## Supplementary Information

Synthesis, structure, and magnetic and biological properties  
of copper(II) complexes with 1,3,4-thiadiazole derivatives

Lyudmila G. Lavrenova, Taisiya S. Sukhikh, Lyudmila A. Glinskaya,  
Svetlana V. Trubina, Valentina V. Zvereva, Alexander N. Lavrov,  
Lyubov S. Klyushova, Alexander V. Artem'ev

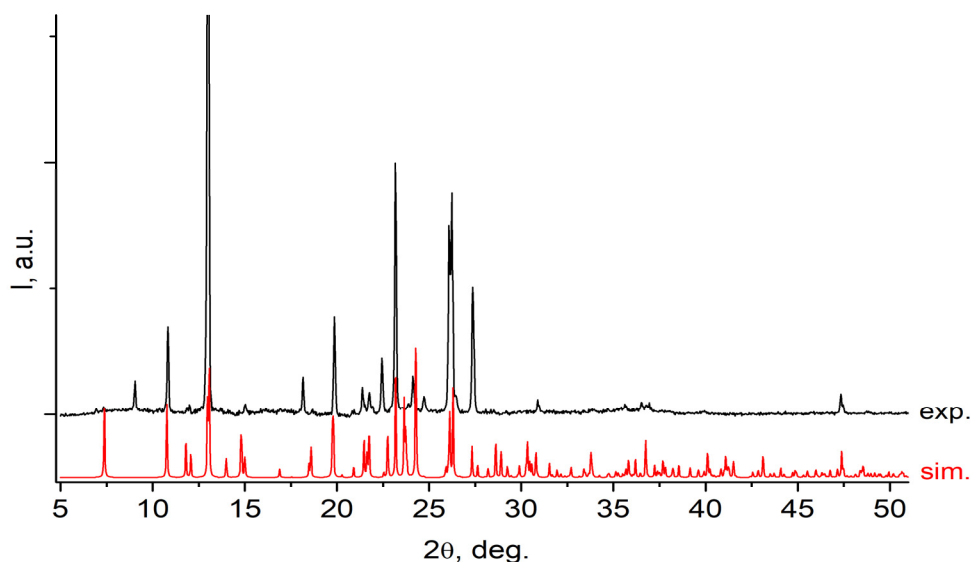

**Figure S1.** Experimental and simulated XRD powder patterns for  $\text{Cu}(\text{L}^1)_2\text{Br}_2$ .

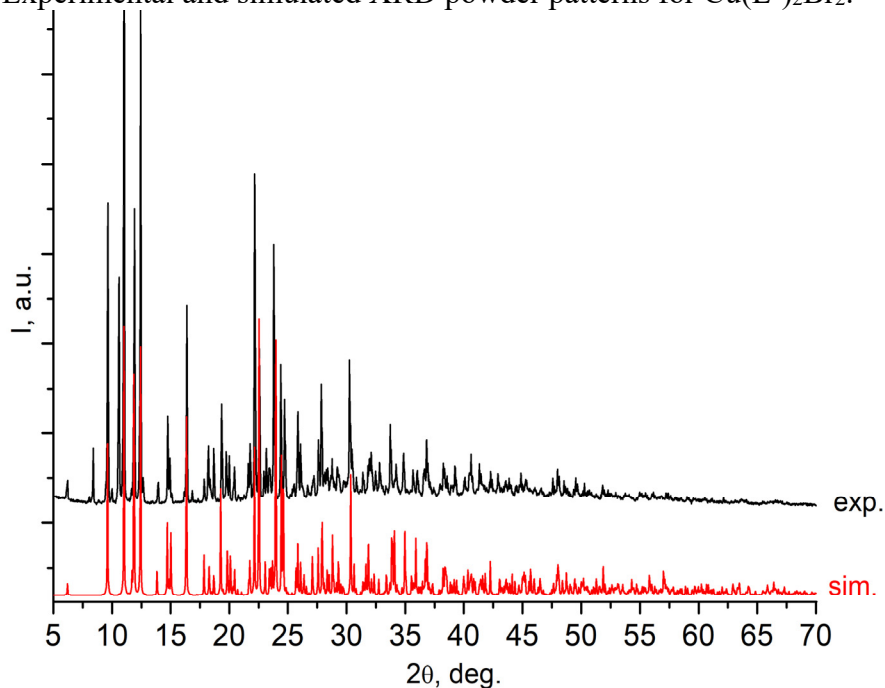

**Figure S2.** Experimental and simulated XRD powder patterns for  $\text{Cu}(\text{L}^1)_2(\text{C}_2\text{N}_3)_2$ .

**Table S1.** CSD 5.44 (April 2023) survey of crystal structures comprising a fragment  $\{\text{CuL}_x\text{Br}_y\}$ , where L = N heterocyclic ligand with the N having three neighbors (i.e. the N is  $\text{sp}^2$ -hybridized),  $x, y = 2\text{--}4$ . The coordination number (CN) is restricted to be equal of selected environment.

|      |     |    |    |    |   |   |
|------|-----|----|----|----|---|---|
|      |     |    |    |    |   |   |
| CN   | 4   | 5  | 5  | 6  | 6 | 6 |
| hits | 268 | 73 | 51 | 29 | 8 | 2 |

**Table S2.** CSD 5.44 (April 2023) survey of crystal structures comprising a fragment  $\{\text{CuN}_x(\text{C}_2\text{N}_3)\}$ , where  $x = 3\text{--}5$ , with any  $\kappa$ -N-ligands. The coordination number (CN) is restricted to be equal of selected environment.

|      |    |    |    |
|------|----|----|----|
|      |    |    |    |
| CN   | 4  | 5  | 6  |
| hits | 10 | 61 | 24 |

**Table S3.** Crystal data and structure refinement details for **1** and **2**

| Parameter                                            | <b>1</b>                                                      | <b>2</b>                                                  |
|------------------------------------------------------|---------------------------------------------------------------|-----------------------------------------------------------|
| Empirical formula                                    | $\text{C}_{12}\text{H}_{20}\text{Br}_2\text{CuN}_4\text{S}_6$ | $\text{C}_{10}\text{H}_{10}\text{N}_8\text{S}_3\text{Cu}$ |
| Molecular weight                                     | 636.04                                                        | 401.99                                                    |
| Crystal system                                       | Triclinic                                                     | Triclinic                                                 |
| Space group                                          | $P\bar{1}$                                                    | $P\bar{1}$                                                |
| $a, \text{\AA}$                                      | 8.6690(3)                                                     | 7.8405(6)                                                 |
| $b, \text{\AA}$                                      | 9.8723(3)                                                     | 8.6679(4)                                                 |
| $c, \text{\AA}$                                      | 14.6229(4)                                                    | 12.1902(9)                                                |
| $\alpha, ^\circ$                                     | 80.407(1)                                                     | 97.763(2)                                                 |
| $\beta, ^\circ$                                      | 75.956(1)                                                     | 95.598(2)                                                 |
| $\gamma, ^\circ$                                     | 67.320(1)                                                     | 108.517(2)                                                |
| $V, \text{\AA}^3$                                    | 1116.44(6)                                                    | 769.62(9)                                                 |
| $Z; D_{\text{calc}}, \text{g/cm}^3$                  | 2, 1.892                                                      | 2, 1.745                                                  |
| $\mu, \text{mm}^{-1}$                                | 5.124                                                         | 1.833                                                     |
| Crystal dimensions, mm                               | 0.15x0.05x 0.02                                               | 0.14x0.14x 0.08                                           |
| $2\theta$ Range for data collection, deg.            | 5.13–63.14                                                    | 5.04–61.04                                                |
| Reflections collected / unique                       | 27939<br>7452                                                 | 15207<br>4621                                             |
| Reflections with $I > 2\sigma(I)$                    | 6563                                                          | 4147                                                      |
| Refined parameters                                   | 244                                                           | 201                                                       |
| GOOF on $F^2$                                        | 1.052                                                         | 1.035                                                     |
| Final $R$ indices [ $I > 2\sigma(I)$ ] $R_1, wR_2$   | 0.0252<br>0.0515                                              | 0.0307<br>0.0670                                          |
| $R$ indices (all data) $R_1, wR_2$                   | 0.0314<br>0.0536                                              | 0.0352<br>0.0694                                          |
| Largest diff. peak and hole, $\text{e}/\text{\AA}^3$ | 1.19/ –1.01                                                   | 0.53/ –0.50                                               |

**Table S4.** Main interatomic distances and bond angles in the structures of **1** and **2**

| <b>1</b>    |            | <b>2</b>                              |            |
|-------------|------------|---------------------------------------|------------|
| Bond        | d, Å       | Bond                                  | d, Å       |
| Cu1–Br1     | 2.3725(3)  | Cu1–N2                                | 2.2427(15) |
| Cu1–Br2     | 2.3800(3)  | Cu1–N5 <sup>1</sup>                   | 1.9744(16) |
| Cu1–N2      | 1.9739(13) | Cu1–N3                                | 1.9814(15) |
| Cu1–N2A     | 1.9837(14) | Cu1–N5B                               | 1.9740(16) |
| S2–C3       | 1.728(2)   | Cu1–N3B <sup>2</sup>                  | 1.9789(15) |
| S2–C4       | 1.739(2)   | S2–C4                                 | 1.7295(17) |
| S2A–C3A     | 1.723(2)   | S2–C3                                 | 1.7406(18) |
| S2A–C4A     | 1.737(2)   | S3–C4                                 | 1.7431(17) |
| S1–C3       | 1.731(2)   | S3–C5                                 | 1.8133(19) |
| S1–C2       | 1.819(2)   | S1–C2                                 | 1.812(2)   |
| S1A–C3A     | 1.731(2)   | S1–C3                                 | 1.738(2)   |
| S1A–C2A     | 1.820(2)   | N2–N1                                 | 1.390(2)   |
| S3–C4       | 1.734(2)   | N2–C4                                 | 1.304(2)   |
| S3–C5       | 1.814(2)   |                                       |            |
| Angle       | ω, deg.    | Angle                                 | ω, deg.    |
| Br1–Cu1–Br2 | 152.34(1)  | N5 <sup>1</sup> –Cu1–N2               | 96.73(6)   |
| N2–Cu1–Br1  | 91.98(4)   | N3–Cu1–N2                             | 98.65(6)   |
| N2–Cu1–Br2  | 92.15(4)   | N3–Cu1–N5 <sup>1</sup>                | 88.32(6)   |
| N2–Cu1–N2A  | 158.30(6)  | N5B–Cu1–N2                            | 94.27(6)   |
| N2A–Cu1–Br1 | 93.30(4)   | N5B–Cu1–N5 <sup>1</sup>               | 169.00(7)  |
| N2A–Cu1–Br2 | 92.87(4)   | N5B–Cu1–N3                            | 90.56(6)   |
| C3–S2–C4    | 87.17(8)   | N3B <sup>2</sup> –Cu1–N2              | 95.06(6)   |
| C3A–S2A–C4A | 87.24(8)   | N3B <sup>2</sup> –Cu1–N5 <sup>1</sup> | 91.00(6)   |
| C3–S1–C2    | 101.72(8)  | N3B <sup>2</sup> –Cu1–N3              | 166.25(7)  |
| C3A–S1A–C2A | 102.11(9)  | N3B <sup>2</sup> –Cu1–N5B             | 87.50(6)   |

<sup>#1</sup> 1-X, 1-Y, 2-Z; <sup>#2</sup> –X, –Y, 1-Z
